# Supplementary material for: Antagonism between abscisic acid and ethylene in Arabidopsis acts in parallel with the reciprocal regulation of their metabolism and signaling pathways
Source: Springer Nature journal article supplement (doi:10.1007/s11103-009-9509-7), 2009-06-09
Supplement: MOESM1 [file 11103_2009_9509_MOESM1_ESM.pdf]

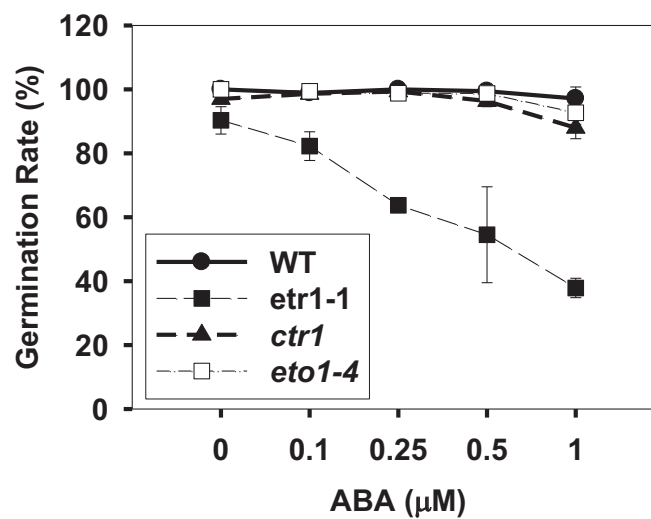

## Supplemental material

**Figure S1. Comparison of the ABA sensitivity levels in the *etr1-1*, *ctr1*, and *eto1-4* mutants**

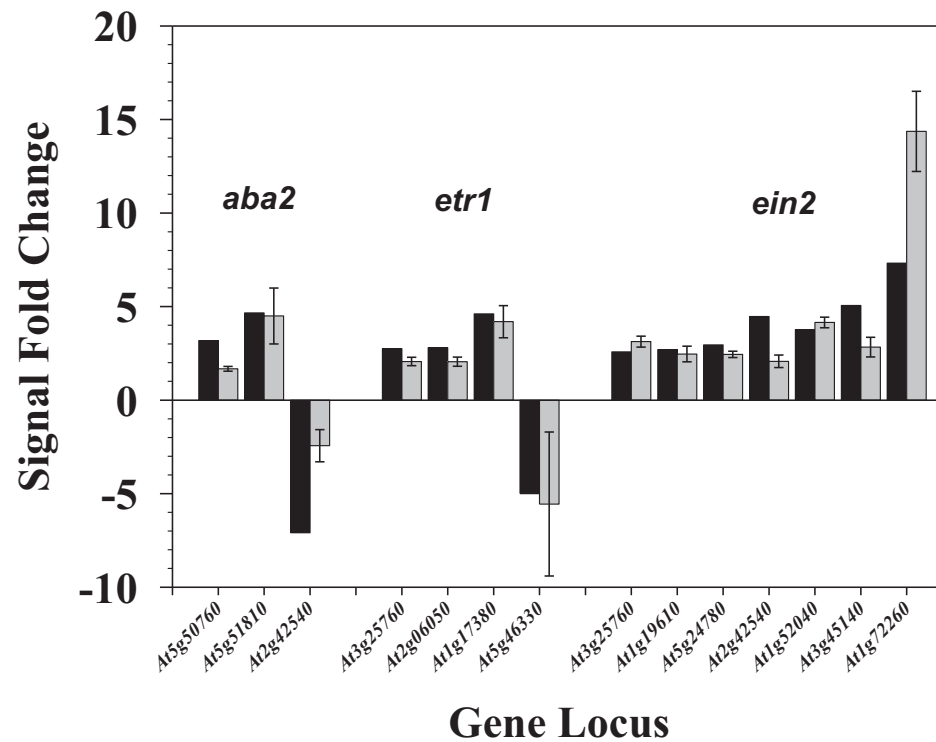

## Supplemental material

**Figure S2. Validation of GeneChip signal by semi-quantitative RT-PCR in the *aba2*, *etr1*, and *ein2* mutants**

## Supplemental data

### **Figure S1.** Comparison of the ABA sensitivity levels in the *etr1-1*, *ctr1*, and *eto1-4* mutants

Seeds were grown on 1% sucrose for five days. Radicle emergence over 1 mm was regarded as germination. Germination rates were measured as germinated seeds/total germinated seeds at day 10. The results shown are the means  $\pm$  SD of three independent experiments using different seed batches (each with 60 seeds) and giving consistent results.

### **Figure S2.** Validation of GeneChip signal by semi-quantitative RT-PCR in the *aba2*, *etr1*, and *ein2* mutants

Black bars represent the means of the normalized GeneChip signal of two independent experiments. Grey bars represent the means  $\pm$  SD of two independent experiments of semi-quantitative RT-PCR. Each experiment was duplicated. The genes tested here were chosen from Table S1.
